# Supplementary material for: ISOpureR: an R implementation of a computational purification algorithm of mixed tumour profiles
Source: Springer Nature journal article supplement (doi:10.1186/s12859-015-0597-x), 2015-05-13
Supplement: 12859_2015_597_MOESM1_ESM.pdf [file 12859_2015_597_MOESM1_ESM.pdf]

**Table 1** The current code availability of each software (similar to Table 1 of [52]). As ISOpure and DeMix are similar, they are listed first; all other software is listed according to the year of publication. ISOpure is available in both MATLAB and R, and some methods have source code incorporated into the CellMix package, available at <https://r-forge.r-project.org/scm/viewvc.php/pkg/CellMix/?root=cellmix&sortdir=down>.

| Method               | Year published | Language(s) | Source                                                                                                                                                                                                                                                                           |
|----------------------|----------------|-------------|----------------------------------------------------------------------------------------------------------------------------------------------------------------------------------------------------------------------------------------------------------------------------------|
| ISOpure (Quon)       | 2013           | R<br>MATLAB | <a href="http://cran.r-project.org/web/packages/ISOpureR/index.html">http://cran.r-project.org/web/packages/ISOpureR/index.html</a><br><a href="http://people.csail.mit.edu/geraldquon/software.shtml#isopure">http://people.csail.mit.edu/geraldquon/software.shtml#isopure</a> |
| DeMix (Ahn)          | 2013           | R           | <a href="http://odin.mdacc.tmc.edu/~wwang7/DeMix.html">http://odin.mdacc.tmc.edu/~wwang7/DeMix.html</a>                                                                                                                                                                          |
| Abbas                | 2009           | R           | CellMix: <a href="https://r-forge.r-project.org/scm/viewvc.php/pkg/CellMix/?root=cellmix&amp;sortdir=down">https://r-forge.r-project.org/scm/viewvc.php/pkg/CellMix/?root=cellmix&amp;sortdir=down</a>                                                                           |
| deconf (Repsilber)   | 2010           | R           | CellMix & <a href="http://www.biomedcentral.com/1471-2105/11/27">http://www.biomedcentral.com/1471-2105/11/27</a>                                                                                                                                                                |
| Clarke               | 2010           | R           | <a href="http://www.biomed.miami.edu/site/clients/UMMM/user/65/doc/mixture_estimation.zip">www.biomed.miami.edu/site/clients/UMMM/user/65/doc/mixture_estimation.zip</a>                                                                                                         |
| csSAM (Shen-Orr)     | 2010           | R           | CellMix & <a href="http://cran.r-project.org/web/packages/csSAM/index.html">http://cran.r-project.org/web/packages/csSAM/index.html</a>                                                                                                                                          |
| DSection (Erkkilä)   | 2010           | R, MATLAB   | CellMix & <a href="http://informatics.systemsbiology.net/DSection">http://informatics.systemsbiology.net/DSection</a>                                                                                                                                                            |
| Gong                 | 2011           | R           | CellMix: <a href="https://r-forge.r-project.org/scm/viewvc.php/pkg/CellMix/?root=cellmix&amp;sortdir=down">https://r-forge.r-project.org/scm/viewvc.php/pkg/CellMix/?root=cellmix&amp;sortdir=down</a>                                                                           |
| PSEA (Kuhn)          | 2011           | R           | <a href="http://www.bioconductor.org/packages/release/bioc/html/PSEA.html">http://www.bioconductor.org/packages/release/bioc/html/PSEA.html</a>                                                                                                                                  |
| ssNMF (Gaujoux)      | 2012           | R           | CellMix: <a href="https://r-forge.r-project.org/scm/viewvc.php/pkg/CellMix/?root=cellmix&amp;sortdir=down">https://r-forge.r-project.org/scm/viewvc.php/pkg/CellMix/?root=cellmix&amp;sortdir=down</a>                                                                           |
| PERT (Qiao)          | 2012           | Octave      | <a href="http://people.csail.mit.edu/geraldquon/software.shtml#pert">http://people.csail.mit.edu/geraldquon/software.shtml#pert</a>                                                                                                                                              |
| DeconRNASeq (Gong)   | 2013           | R           | <a href="http://master.bioconductor.org/packages/release/bioc/html/DeconRNASeq.html">http://master.bioconductor.org/packages/release/bioc/html/DeconRNASeq.html</a>                                                                                                              |
| DSA (Zhong)          | 2013           | R           | CellMix & <a href="https://github.com/zhandong/DSA">https://github.com/zhandong/DSA</a>                                                                                                                                                                                          |
| TEMT (Li)            | 2013           | Python      | <a href="https://github.com/uci-cbcl/TEMT">https://github.com/uci-cbcl/TEMT</a>                                                                                                                                                                                                  |
| ESTIMATE (Yoshihara) | 2013           | R           | <a href="http://sourceforge.net/projects/estimateproject/">http://sourceforge.net/projects/estimateproject/</a>                                                                                                                                                                  |
| UNDO (Wang N.)       | 2014           | R           | <a href="http://master.bioconductor.org/packages/release/bioc/html/UNDO.html">http://master.bioconductor.org/packages/release/bioc/html/UNDO.html</a>                                                                                                                            |
