# Supplementary material for: ISOpureR: an R implementation of a computational purification algorithm of mixed tumour profiles
Source: Springer Nature journal article supplement (doi:10.1186/s12859-015-0597-x), 2015-05-13

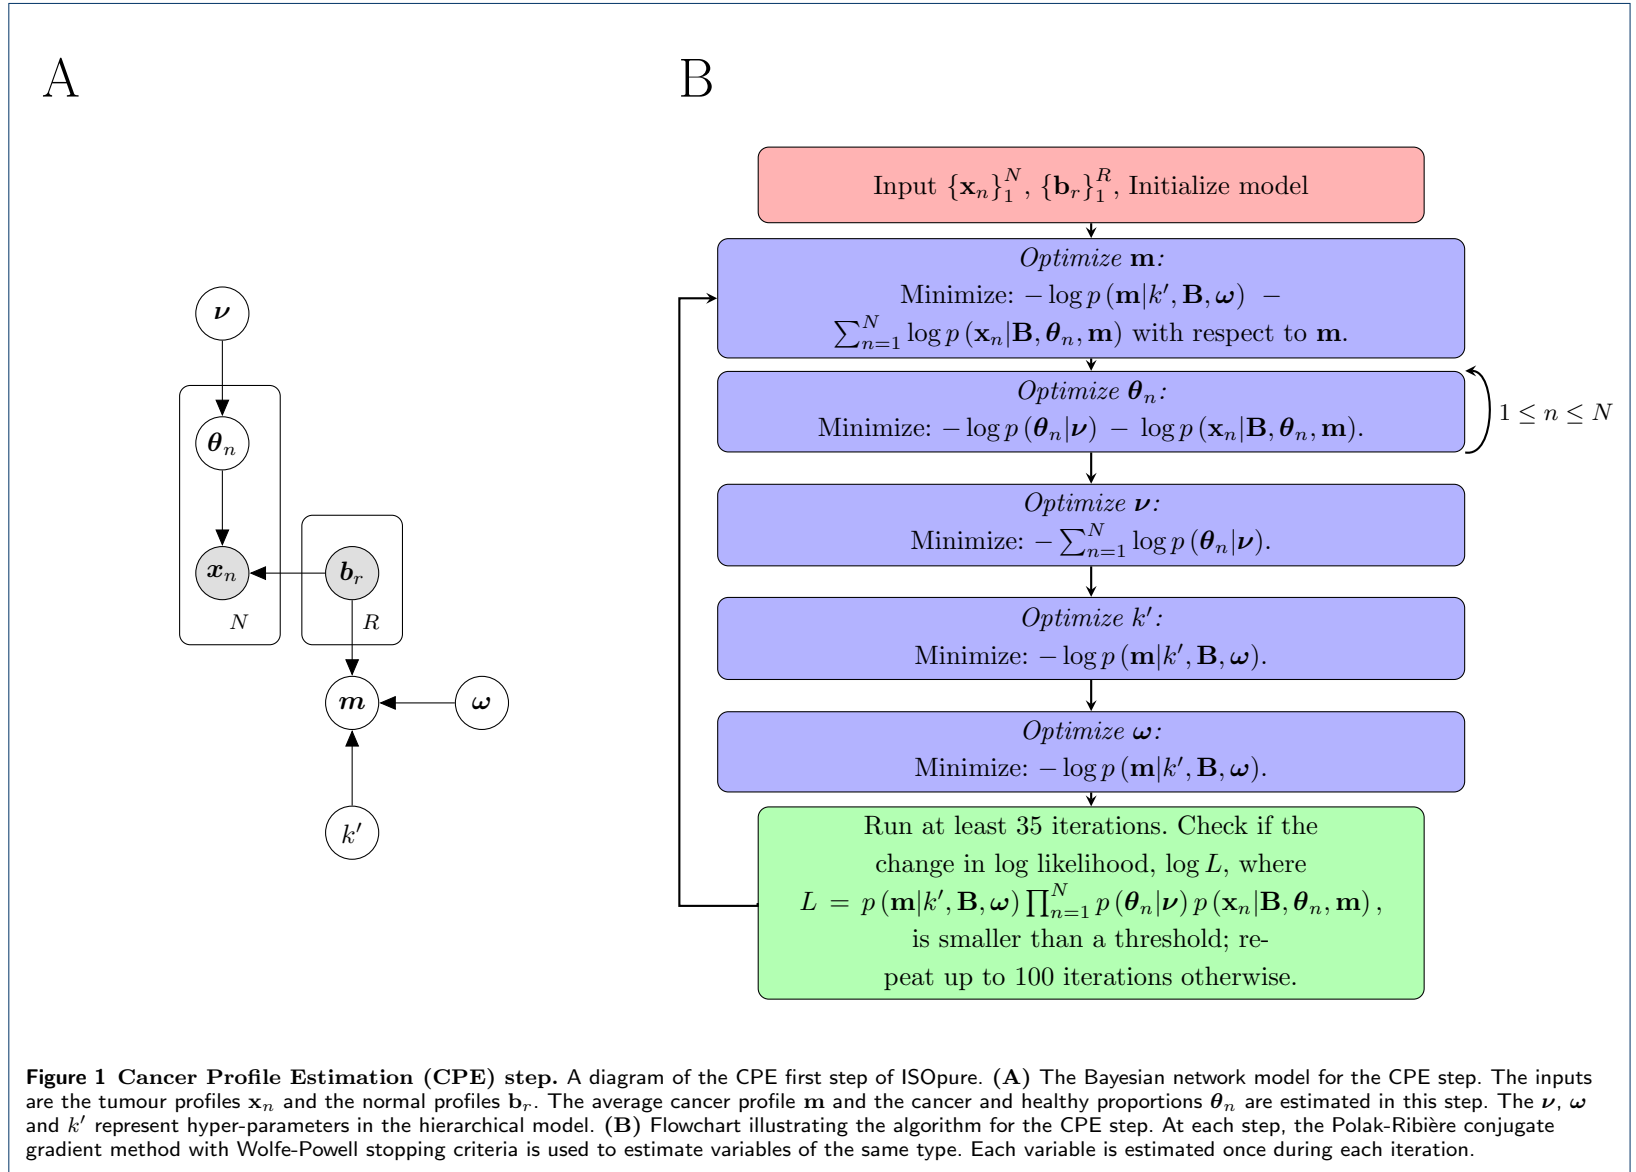

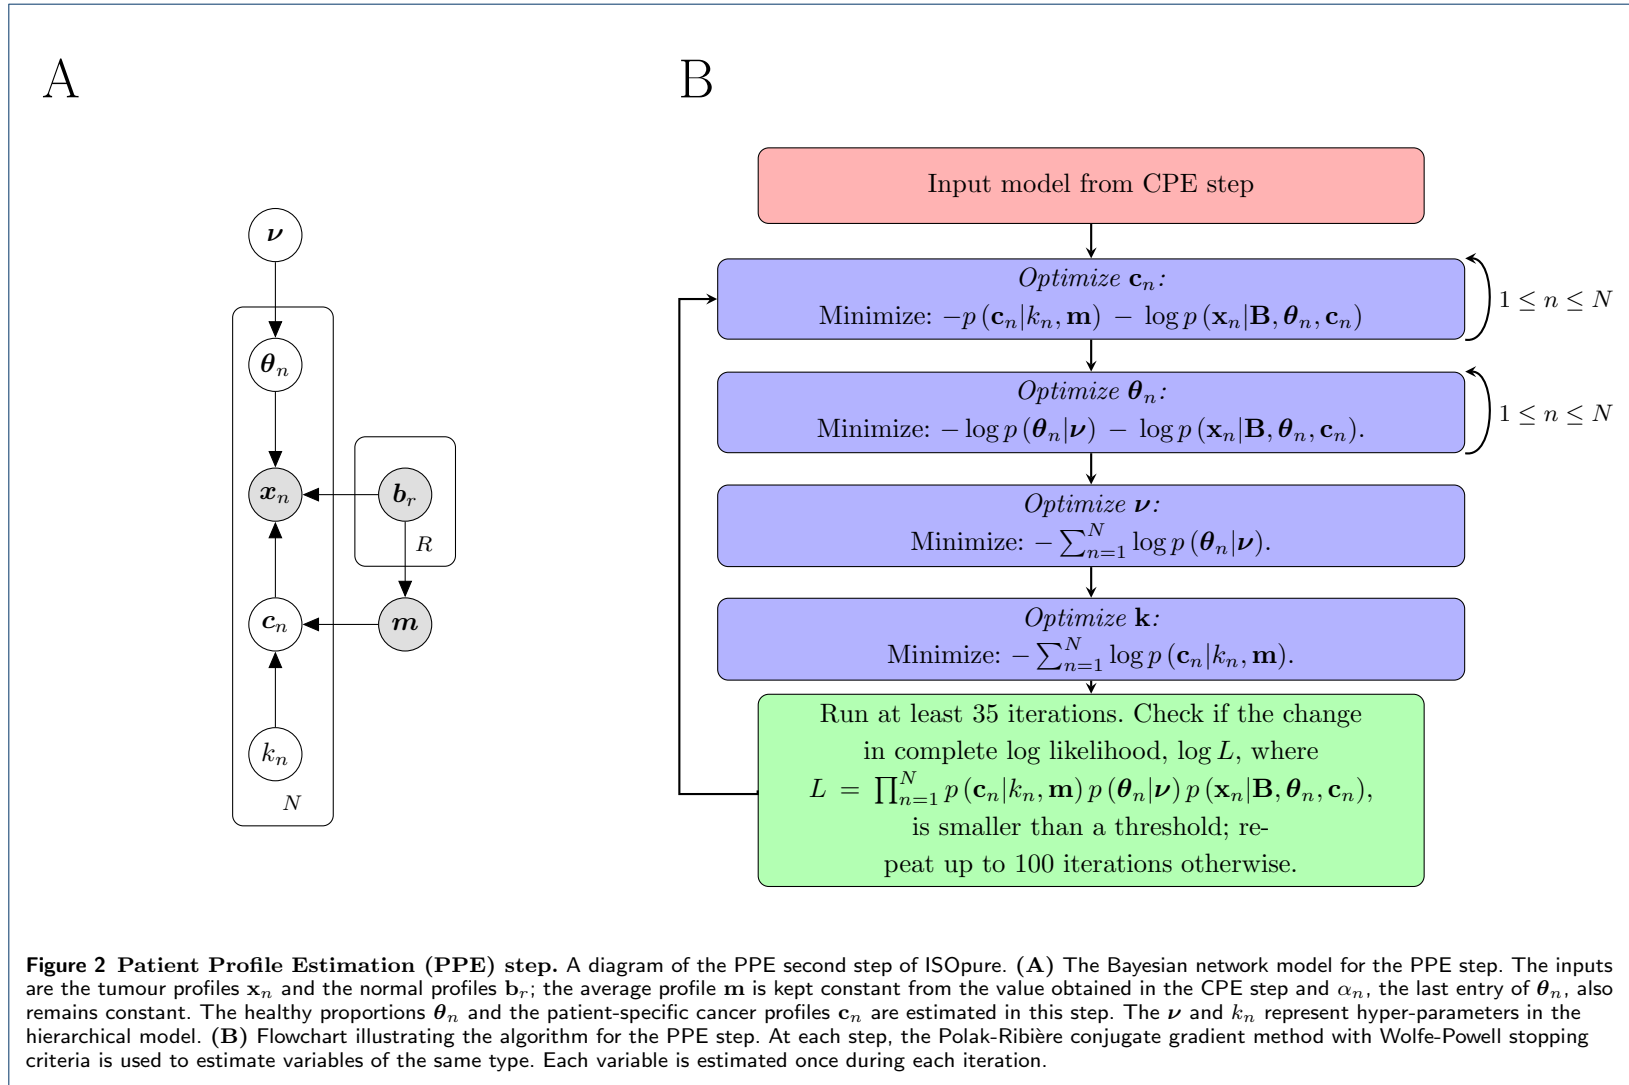

Supplement: 12859_2015_597_MOESM4_ESM.pdf [file 12859_2015_597_MOESM4_ESM.pdf]
