# Supplementary material for: ISOpureR: an R implementation of a computational purification algorithm of mixed tumour profiles
Source: Springer Nature journal article supplement (doi:10.1186/s12859-015-0597-x), 2015-05-13
Supplement: 12859_2015_597_MOESM6_ESM.pdf [file 12859_2015_597_MOESM6_ESM.pdf]

A

(i)

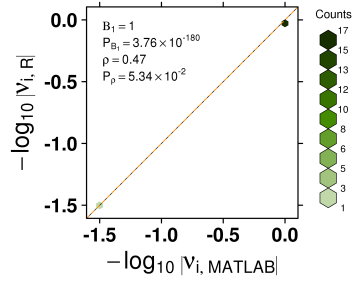

(ii)

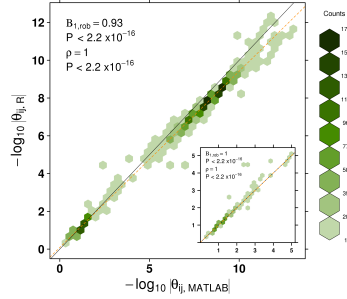

(iii)

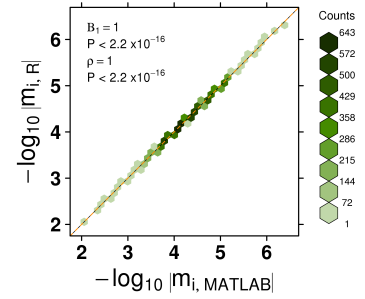

(iv)

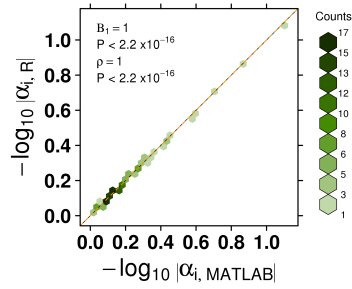

(v)

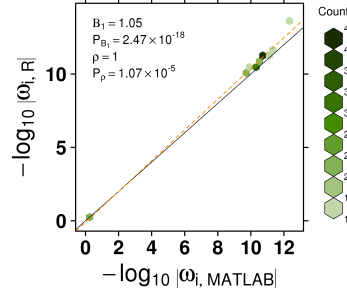

B

(i)

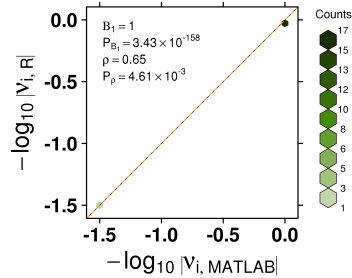

(ii)

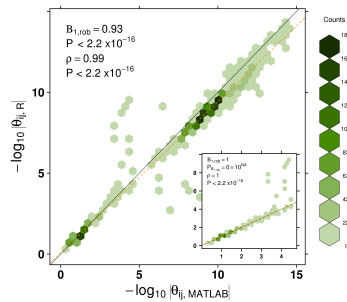

(iii)

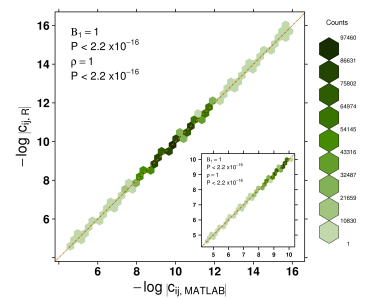

**Figure 1** A comparison of parameters estimated by the MATLAB and R implementations of *ISOpure* for the Bhattacharjee dataset. Each plot shows the entries of a parameter estimated using *ISOpureR* plotted against the corresponding entries estimated using the MATLAB code. The parameter is an average over 50 models run with different initial conditions. The line  $y = x$  is indicated in black, and the linear regression line, or robust regression line for  $\theta$ , is dashed orange. **(A)** Parameters from the Cancer Profile Estimation step of *ISOpure* are: (i)  $\nu$ , the hyper-parameter for the Dirichlet distribution over  $\theta$ , (ii)  $\theta$ , the proportion of a patient sample from a known healthy-tissue profile, (iii)  $m$ , the average mRNA abundance cancer profile, (iv)  $\alpha$ , the fraction of cancer cells for every patient sample, (v)  $\omega$  a hyper-parameter for the Dirichlet distribution over  $m$ . **(B)** Parameters from the Patient Profile Estimation step of *ISOpure* are (i)  $\nu$ , the hyper-parameter for the Dirichlet distribution over  $\theta$ , (ii)  $\theta$ , the proportion of a patient sample from a known healthy-tissue profile, (iii)  $c_{ij}$ , the purified mRNA abundance cancer profile for each patient.

A

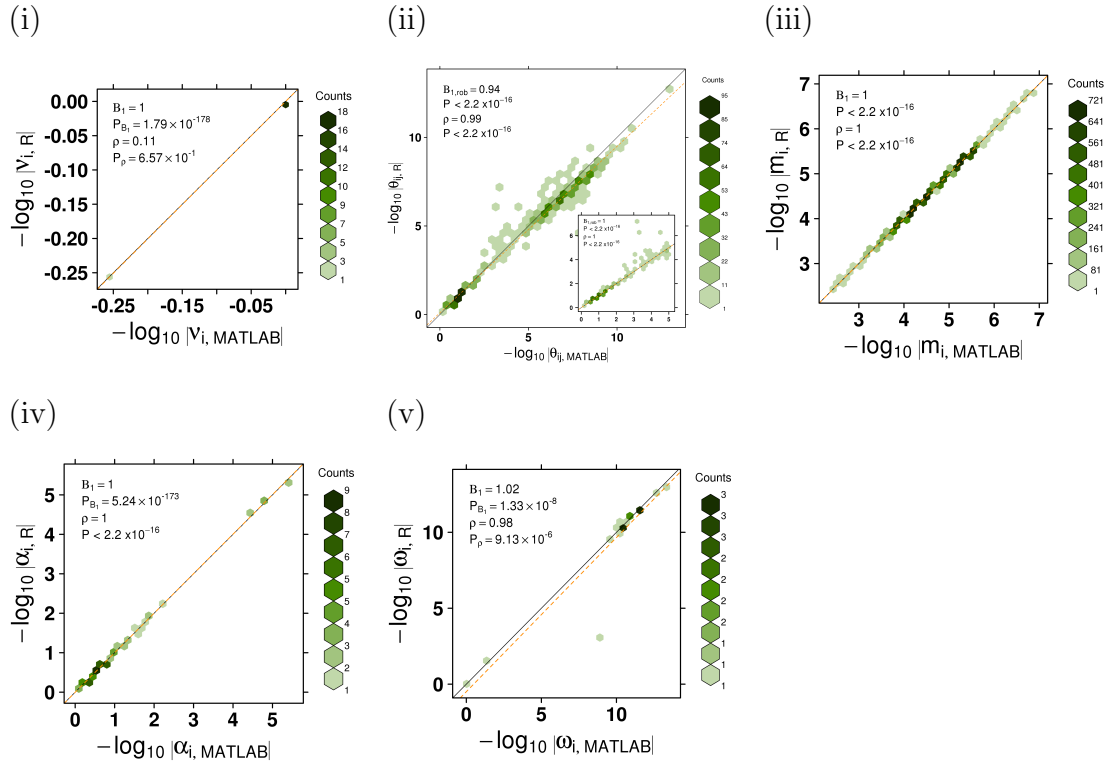

B

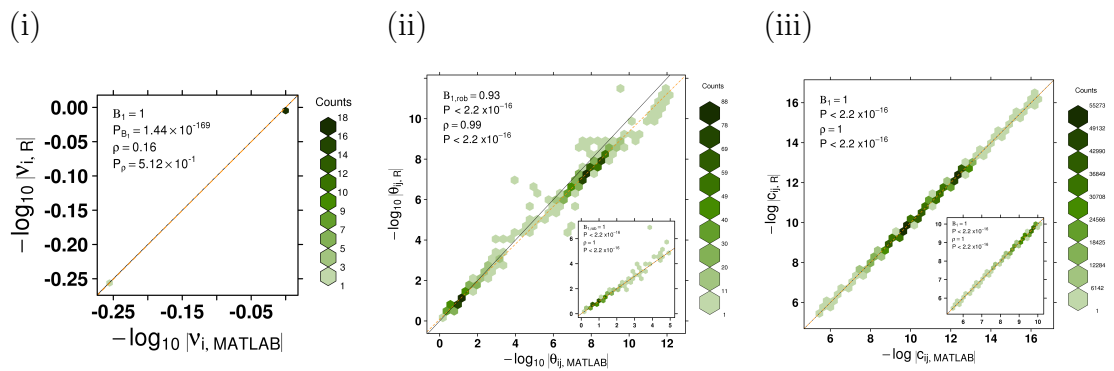

**Figure 2** A comparison of parameters estimated by the MATLAB and R implementations of *ISOpure* for the Wallace dataset. Each plot shows the entries of a parameter estimated using *ISOpureR* plotted against the corresponding entries estimated using the MATLAB code. The parameter is an average over 50 models run with different initial conditions. The line  $y = x$  is indicated in black, and the linear regression line, or robust regression line for  $\theta$ , is dashed orange. A description of the parameters from the Cancer Profile Estimation step (A) and the Patient Profile Estimation step (B) of *ISOpure* is given in Figure 1.

A

(i)

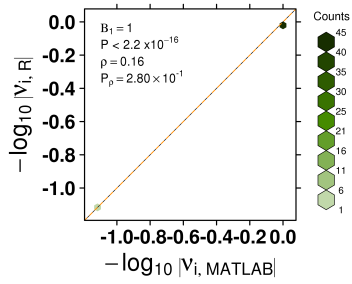

(ii)

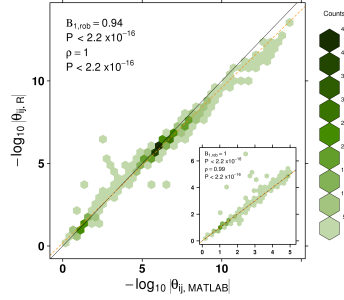

(iii)

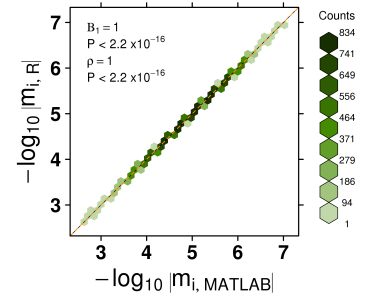

(iv)

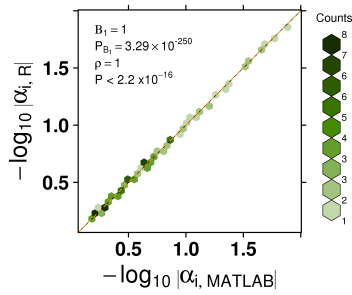

(v)

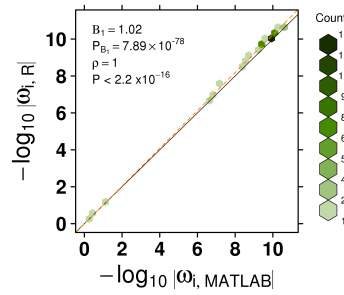

B

(i)

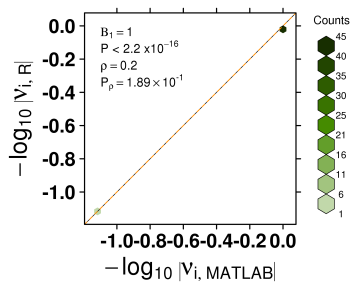

(ii)

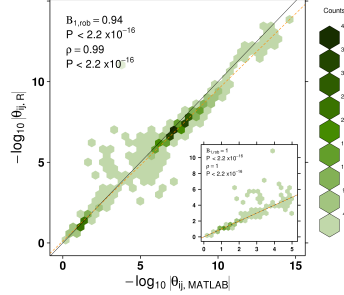

(iii)

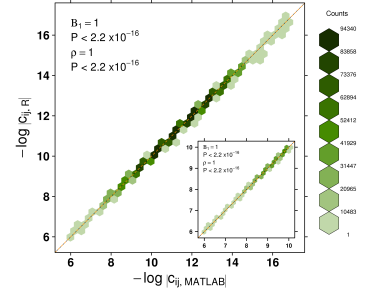

**Figure 3** A comparison of parameters estimated by the MATLAB and R implementations of *ISOpure* for the Wang dataset. Each plot shows the entries of a parameter estimated using *ISOpureR* plotted against the corresponding entries estimated using the MATLAB code. The parameter is an average over 25 MATLAB models run with different initial conditions and 13 R models; models converging to a local minimum were omitted. The line  $y = x$  is indicated in black, and the linear regression line, or robust regression line for  $\theta$ , is dashed orange. A description of the parameters from the Cancer Profile Estimation step (A) and the Patient Profile Estimation step (B) of *ISOpure* is given in Figure 1.
