# Supplementary material for: ISOpureR: an R implementation of a computational purification algorithm of mixed tumour profiles
Source: Springer Nature journal article supplement (doi:10.1186/s12859-015-0597-x), 2015-05-13
Supplement: 12859_2015_597_MOESM7_ESM.pdf [file 12859_2015_597_MOESM7_ESM.pdf]

**Table 1** Statistics for the MATLAB and R parameter means taken over 49 models for the Beer lung adenocarcinoma dataset with different initial conditions, random restarts omitted. The initial conditions are initial values of  $\nu$  (or `vv` in the code), which were uploaded from a saved file, so that both MATLAB and R code was run first with initial  $\nu_1$ , then  $\nu_2$ , up to  $\nu_{50}$ . One model was omitted (number 14) as the MATLAB algorithms gave a  $\theta$  value that was zero. Each row corresponds to a single parameter. For some parameters (e.g. 'omega' and 'omega-larger') a comparison is made only among the larger components of the vector or matrix parameter, so that only components that are larger than  $10^{-5}$  are compared. The number after the parameter name indicates whether the parameter is estimated in Step 1 (CPE) or Step 2 (PPE) of ISOpure.

| Parameter-step  | Fraction (of vector/matrix entries) more than 0.05 different | Check bias<br>(difference $(\bar{x}_M - \bar{x}_R)$ centered about 0?) |                 |                                   |                                   | Summary of fractional difference<br>$ \bar{x}_M - \bar{x}_R / \bar{x}_M $ |             |             |            |            |           |
|-----------------|--------------------------------------------------------------|------------------------------------------------------------------------|-----------------|-----------------------------------|-----------------------------------|---------------------------------------------------------------------------|-------------|-------------|------------|------------|-----------|
|                 |                                                              | Median difference                                                      | Mean difference | Min value of entry in $\bar{x}_M$ | Max value of entry in $\bar{x}_M$ | Min                                                                       | 1st Qu      | Median      | Mean       | 3rd Qu     | Max       |
| vv-1            | 0                                                            | -6.1016E-12                                                            | -0.000244289    | 1                                 | 17.0155521605                     | 1.217E-13                                                                 | 1.644E-12   | 6.102E-12   | 0.00001436 | 1.283E-11  | 0.0001579 |
| omega-1         | 0.6                                                          | 3.0407E-11                                                             | -5.2514E-18     | 8.0486E-11                        | 0.3452114569                      | 0.003724                                                                  | 0.01843     | 0.08632     | 0.2216     | 0.3488     | 0.9432    |
| omega-larger-1  | 0                                                            | -0.00085601                                                            | -9.3184E-9      | 0.1586577679                      | 0.3452114569                      | 0.003724                                                                  | 0.00594     | 0.01204     | 0.01233    | 0.01843    | 0.02151   |
| mm-1            | 0                                                            | 1.5441E-9                                                              | -7.8246E-20     | 1.9958E-7                         | 0.0049742972                      | 4.446E-9                                                                  | 0.00001683  | 0.00002946  | 0.00008061 | 0.0000471  | 0.03653   |
| alphapurities-1 | 0                                                            | -4.8267E-5                                                             | -0.000037519    | 0.2613000309                      | 0.896986884                       | 5.266E-7                                                                  | 0.00006131  | 0.00007417  | 0.00009067 | 0.00009506 | 0.001065  |
| kappa-2         | 0                                                            | -2479.6695                                                             | -2479.66945     | 5013768.8169                      | 5013768.8169                      | 0.0004946                                                                 | 0.0004946   | 0.0004946   | 0.0004946  | 0.0004946  | 0.0004946 |
| vv-2            | 0                                                            | -2.52889E-11                                                           | -0.0002443      | 1                                 | 17.0155521883                     | 3.076E-12                                                                 | 1.495E-11   | 2.529E-11   | 0.00001436 | 9.22E-11   | 0.0001579 |
| theta-1         | 0.6860465116                                                 | -1.1342E-8                                                             | 3.75190E-6      | 3.0763E-32                        | 0.5694067422                      | 7.042E-7                                                                  | 0.00189     | 1.603       | 6.152      | 2.917      | 2115      |
| theta-larger-1  | 0.0561403509                                                 | 3.6889E-6                                                              | 1.2197E-5       | 1.1299E-5                         | 0.5694067422                      | 7.042E-7                                                                  | 0.0002018   | 0.0005109   | 0.0264     | 0.001777   | 1.147     |
| theta-2         | 0.6872093023                                                 | -7.6443E-10                                                            | 3.7519E-6       | 5.4128E-16                        | 0.5648821074                      | 5.469E-7                                                                  | 0.0044      | 2.098       | 4.34       | 3.38       | 210.1     |
| theta-larger-2  | 0.1003344482                                                 | 9.28076E-6                                                             | 1.0836E-5       | 3.9365E-5                         | 0.5648821074                      | 5.469E-7                                                                  | 0.000263    | 0.000891    | 0.03324    | 0.006765   | 1         |
| log_cc-2        | 0                                                            | 1.2994E-5                                                              | -0.00001765     | -16.3363                          | -5.2260                           | 2.473E-11                                                                 | 0.000002116 | 0.000004737 | 0.00001647 | 0.00001076 | 0.01575   |

**Table 2 Statistics for the MATLAB and R parameter means taken over 50 models for the Bhattacharjee lung adenocarcinoma dataset with different initial conditions, random restarts omitted. Table entries are as described for Table 1.**

| Parameter-step  | Fraction (of vector/matrix entries) more than 0.05 different | Check bias<br>(difference $(\bar{x}_M - \bar{x}_R)$ centered about 0?) |                 |                                   |                                   | Summary of fractional difference<br>$ \bar{x}_M - \bar{x}_R / \bar{x}_M $ |             |            |             |            |           |
|-----------------|--------------------------------------------------------------|------------------------------------------------------------------------|-----------------|-----------------------------------|-----------------------------------|---------------------------------------------------------------------------|-------------|------------|-------------|------------|-----------|
|                 |                                                              | Median difference                                                      | Mean difference | Min value of entry in $\bar{x}_M$ | Max value of entry in $\bar{x}_M$ | Min                                                                       | 1st Qu      | Median     | Mean        | 3rd Qu     | Max       |
| vv-1            | 0                                                            | 2.0264E-12                                                             | 0.0002117       | 1                                 | 31.714359445                      | 3.744E-13                                                                 | 1.256E-12   | 2.782E-12  | 0.000006674 | 6.69E-12   | 0.0001201 |
| omega-1         | 0.8823529412                                                 | 1.2534E-11                                                             | -2.7139E-18     | 4.5876E-13                        | 0.5632330201                      | 0.00008124                                                                | 0.5172      | 0.5254     | 0.49        | 0.5293     | 0.9706    |
| omega-larger-1  | 0                                                            | -1.8996E-10                                                            | -1.8996E-10     | 0.4367669792                      | 0.5632330201                      | 0.00008124                                                                | 0.00008712  | 0.000093   | 0.000093    | 0.00009888 | 0.0001048 |
| mm-1            | 0                                                            | -9.3252E-11                                                            | 5.6262E-19      | 4.1112E-7                         | 0.0088030088                      | 1.17E-8                                                                   | 0.000009127 | 0.00002018 | 0.00004189  | 0.00004047 | 0.01024   |
| alphapurities-1 | 0                                                            | 1.4901E-5                                                              | 0.000029914     | 0.0789636302                      | 0.9585213184                      | 4.793E-8                                                                  | 0.00001336  | 0.00002493 | 0.00005345  | 0.00004363 | 0.002601  |
| kappa-2         | 0                                                            | -27688.1445                                                            | -27688.1445     | 2445477.6228                      | 2445477.6228                      | 0.01132                                                                   | 0.01132     | 0.01132    | 0.01132     | 0.01132    | 0.01132   |
| vv-2            | 0                                                            | -5.06297E-11                                                           | 0.0002116697    | 1                                 | 31.7143593985                     | 3.285E-12                                                                 | 2.524E-11   | 8.455E-11  | 0.000006674 | 1.748E-10  | 0.0001201 |
| theta-1         | 0.7735928904                                                 | -1.1067E-8                                                             | -1.7596E-6      | 1.5581E-13                        | 0.4743590714                      | 5.744E-7                                                                  | 0.2345      | 1.574      | 1.882       | 2.35       | 368.9     |
| theta-larger-1  | 0.0463458111                                                 | -9.9138E-6                                                             | -6.8066E-6      | 1.3322E-5                         | 0.4743590714                      | 5.744E-7                                                                  | 0.0001196   | 0.0004059  | 0.02257     | 0.001186   | 2.218     |
| theta-2         | 0.7850190436                                                 | -8.1726E-10                                                            | -1.7596E-6      | 2.7643E-15                        | 0.487851479                       | 0.000007179                                                               | 0.24        | 1.947      | 8545        | 2.806      | 19730000  |
| theta-larger-2  | 0.1630615641                                                 | -2.2472E-6                                                             | -2.4209E-6      | 3.3047E-5                         | 0.487851479                       | 0.000007179                                                               | 0.0005785   | 0.002211   | 0.04925     | 0.01539    | 1.444     |
| log_cc-2        | 0                                                            | -0.000173596                                                           | -0.000144165    | -15.8492                          | -4.59372272                       | 2.309E-11                                                                 | 0.00001615  | 0.00003454 | 0.00004863  | 0.00006113 | 0.009799  |

**Table 3 Statistics for the MATLAB and R parameter means taken over 50 models for the Wallace prostate cancer dataset with different initial conditions, random restarts omitted. Table entries are as described for Table 1.**

| Parameter-step  | Fraction (of vector/matrix entries) more than 0.05 different | Check bias<br>(difference $(\bar{x}_M - \bar{x}_R)$ centered about 0?) |                 |                                   |                                   | Summary of fractional difference<br>$ \bar{x}_M - \bar{x}_R / \bar{x}_M $ |            |            |            |           |          |
|-----------------|--------------------------------------------------------------|------------------------------------------------------------------------|-----------------|-----------------------------------|-----------------------------------|---------------------------------------------------------------------------|------------|------------|------------|-----------|----------|
|                 |                                                              | Median difference                                                      | Mean difference | Min value of entry in $\bar{x}_M$ | Max value of entry in $\bar{x}_M$ | Min                                                                       | 1st Qu     | Median     | Mean       | 3rd Qu    | Max      |
| vv-1            | 0                                                            | -2.4849E-12                                                            | -0.000162842    | 1                                 | 1.8006873086                      | 4.146E-13                                                                 | 1.137E-12  | 3.84E-12   | 0.00009043 | 7.165E-12 | 0.001718 |
| omega-1         | 0.8333333333                                                 | -7.2499E-13                                                            | 5.6714E-18      | 4.6268E-14                        | 0.9537608364                      | 0.0009908                                                                 | 0.2534     | 0.2935     | 27820      | 0.3034    | 500700   |
| omega-larger-1  | 0                                                            | 0.0003176316                                                           | 0.0003176316    | 0.0462391618                      | 0.9537608364                      | 0.0009908                                                                 | 0.009287   | 0.01758    | 0.01758    | 0.02588   | 0.03418  |
| mm-1            | 0.000247117                                                  | 2.1561E-9                                                              | 3.0594E-19      | 1.3356E-7                         | 0.0037100411                      | 7.715E-9                                                                  | 0.0003915  | 0.0008654  | 0.00167    | 0.001629  | 0.08743  |
| alphapurities-1 | 0                                                            | -0.000590367                                                           | -0.000925895    | 3.8943E-6                         | 0.8085713126                      | 0.0001313                                                                 | 0.002196   | 0.003371   | 0.005969   | 0.00568   | 0.04826  |
| kappa-2         | 0                                                            | -105785.0196                                                           | -105785.0196    | 7492434.9443                      | 7492434.9443                      | 0.01412                                                                   | 0.01412    | 0.01412    | 0.01412    | 0.01412   | 0.01412  |
| vv-2            | 0                                                            | -6.6549E-12                                                            | -0.000162842    | 1                                 | 1.8006873177                      | 1.149E-12                                                                 | 9.154E-12  | 1.188E-11  | 0.00009043 | 2.093E-11 | 0.001718 |
| theta-1         | 0.6425120773                                                 | -4.9353E-8                                                             | 5.14386E-5      | 1.0829E-13                        | 0.6840541574                      | 2.25E-8                                                                   | 0.005756   | 0.4344     | 1.824      | 1.539     | 962.4    |
| theta-larger-1  | 0.1643286573                                                 | -5.3594E-7                                                             | 0.000128392     | 1.0016E-5                         | 0.6840541574                      | 2.25E-8                                                                   | 0.000572   | 0.002832   | 0.07588    | 0.01807   | 5.145    |
| theta-2         | 0.6674718196                                                 | -2.2519E-8                                                             | 5.1439E-5       | 7.3369E-13                        | 0.6839767863                      | 2.875E-8                                                                  | 0.00511    | 1.23       | 45.4       | 2.195     | 551000   |
| theta-larger-2  | 0.1084598698                                                 | 1.02264E-8                                                             | 0.0001407151    | 1.1949E-5                         | 0.6839767863                      | 2.875E-8                                                                  | 0.0003422  | 0.00196    | 0.04691    | 0.008074  | 3.222    |
| log_cc-2        | 0                                                            | -5.1722E-6                                                             | -0.000735235    | -16.3646                          | -5.45440504                       | 8.626E-11                                                                 | 0.00003801 | 0.00008475 | 0.0001689  | 0.0001677 | 0.01827  |

**Table 4 Statistics for the parameter means taken over 25 MATLAB models and 13 R models for the Wang prostate cancer dataset with different initial conditions, random restarts omitted. Table entries are as described for Table 1.**

| Parameter-step  | Fraction (of vector/matrix entries) more than 0.05 different | Check bias<br>(difference $(\bar{x}_M - \bar{x}_R)$ centered about 0?) |                 |                                   |                                   | Summary of fractional difference<br>$ \bar{x}_M - \bar{x}_R / \bar{x}_M $ |            |            |             |           |          |
|-----------------|--------------------------------------------------------------|------------------------------------------------------------------------|-----------------|-----------------------------------|-----------------------------------|---------------------------------------------------------------------------|------------|------------|-------------|-----------|----------|
|                 |                                                              | Median difference                                                      | Mean difference | Min value of entry in $\bar{x}_M$ | Max value of entry in $\bar{x}_M$ | Min                                                                       | 1st Qu     | Median     | Mean        | 3rd Qu    | Max      |
| vv-1            | 0                                                            | 9.6823E-13                                                             | 0.000071652     | 1                                 | 13.0794596305                     | 3.464E-14                                                                 | 8.706E-13  | 3.213E-12  | 0.000005478 | 7.867E-12 | 0.000252 |
| omega-1         | 0.9333333333                                                 | 6.1459E-11                                                             | -5.8291E-19     | 2.4123E-11                        | 0.5460422952                      | 0.002445                                                                  | 0.3972     | 0.4065     | 0.3683      | 0.4103    | 0.5841   |
| omega-larger-1  | 0                                                            | -0.00091896                                                            | -2.2161E-8      | 0.0781153089                      | 0.5460422952                      | 0.002445                                                                  | 0.003057   | 0.00367    | 0.006668    | 0.008779  | 0.01389  |
| mm-1            | 0.000439923                                                  | -4.7380E-10                                                            | 3.5550E-19      | 9.4286E-8                         | 0.0023426968                      | 2.299E-7                                                                  | 0.0003454  | 0.0007949  | 0.002002    | 0.001814  | 0.1269   |
| alphapurities-1 | 0                                                            | -6.6136E-5                                                             | -6.8464E-5      | 0.0130102198                      | 0.6586440473                      | 0.00001167                                                                | 0.0002833  | 0.0006972  | 0.00147     | 0.001196  | 0.04372  |
| kappa-2         | 0                                                            | 100983.6743                                                            | 100983.6743     | 10644669.8099                     | 10644669.8099                     | 0.009487                                                                  | 0.009487   | 0.009487   | 0.009487    | 0.009487  | 0.009487 |
| vv-2            | 0                                                            | 2.9102E-11                                                             | 7.1652E-5       | 1                                 | 13.079459593                      | 1.338E-12                                                                 | 2.821E-11  | 5.212E-11  | 0.000005478 | 1.185E-10 | 0.000252 |
| theta-1         | 0.7060142712                                                 | -3.5299E-8                                                             | 1.5214E-6       | 5.4516E-15                        | 0.6577503907                      | 3.039E-7                                                                  | 0.03265    | 0.2094     | 1.184       | 0.985     | 1133     |
| theta-larger-1  | 0.293598234                                                  | 3.2333E-7                                                              | 6.1511E-6       | 1.0008E-5                         | 0.6577503907                      | 3.039E-7                                                                  | 0.001354   | 0.008085   | 0.09757     | 0.08842   | 3.588    |
| theta-2         | 0.8046890928                                                 | -1.9771E-8                                                             | 1.5214E-6       | 2.4630E-15                        | 0.6583594005                      | 2.603E-7                                                                  | 0.1085     | 0.787      | 2.361       | 1.707     | 2541     |
| theta-larger-2  | 0.1804922516                                                 | 1.2199E-5                                                              | 1.2365E-5       | 1.0486E-5                         | 0.6583594005                      | 2.603E-7                                                                  | 0.001047   | 0.004165   | 0.2148      | 0.02157   | 134.4    |
| log_cc-2        | 0                                                            | 2.7827E-6                                                              | -0.00102363     | -16.8257                          | -5.983422661                      | 1.863E-11                                                                 | 0.00003867 | 0.00008644 | 0.0001851   | 0.0001813 | 0.03398  |
