# Supplementary material for: ISOpureR: an R implementation of a computational purification algorithm of mixed tumour profiles
Source: PubMed Central journal article supplement (PMC4429941; doi:10.1186/s12859-015-0597-x), 2015-05-14

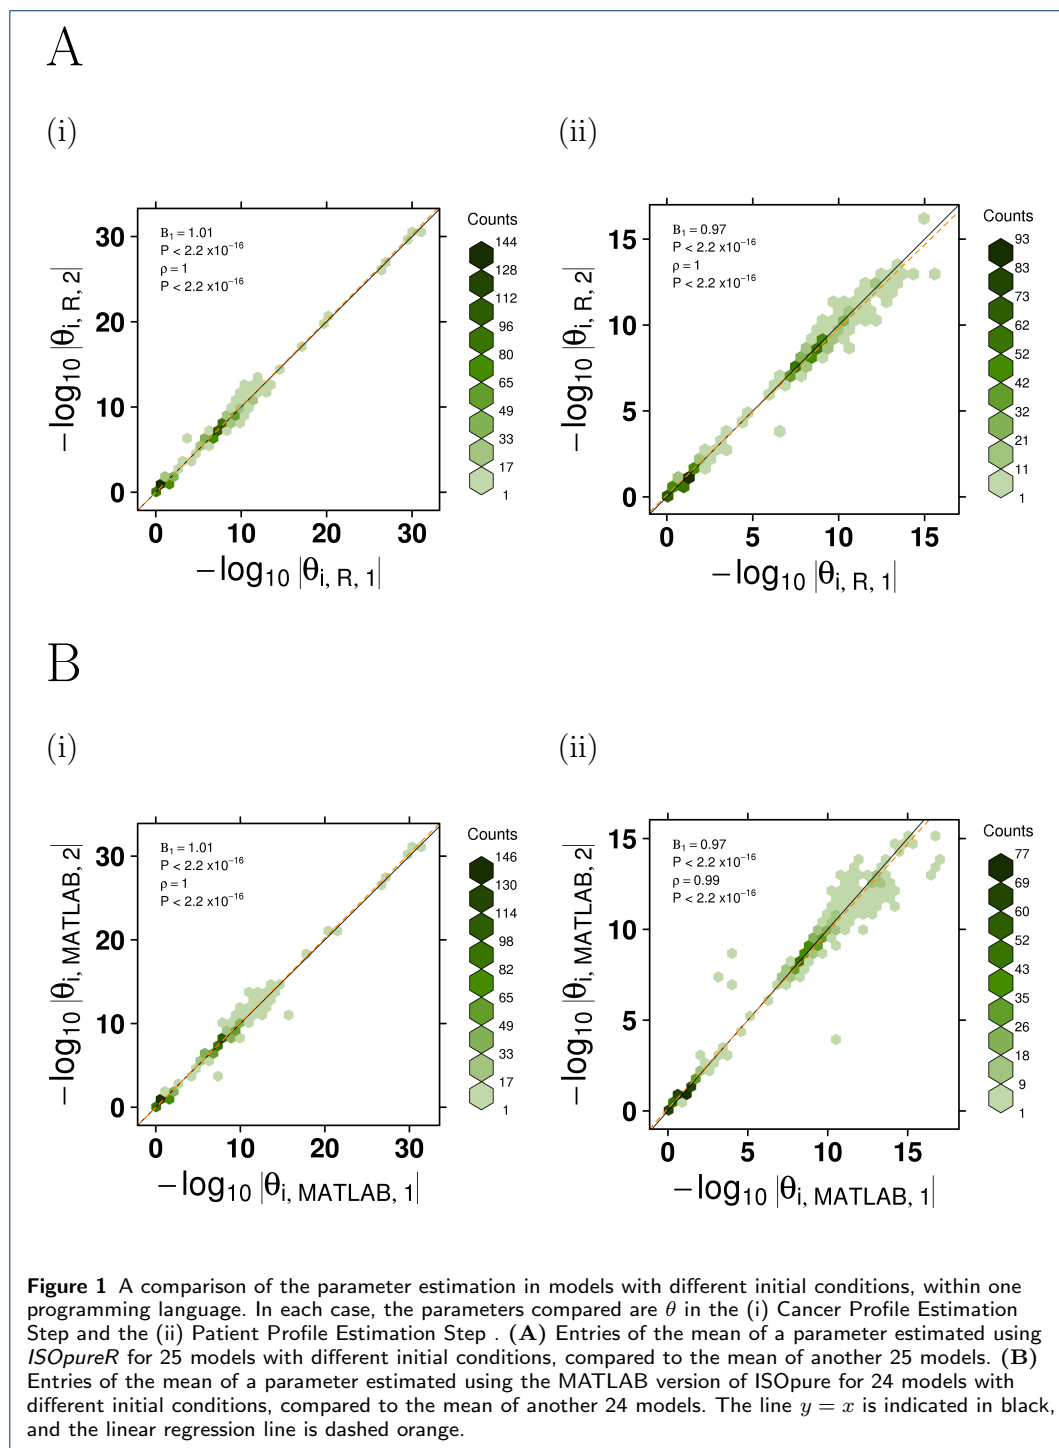

Supplement: 12859_2015_597_MOESM8_ESM.pdf [file 12859_2015_597_MOESM8_ESM.pdf]
